# Supplementary material
Source: PubMed Central journal article supplement (PMC7050357)

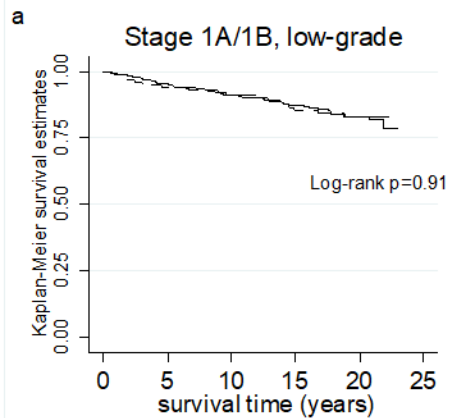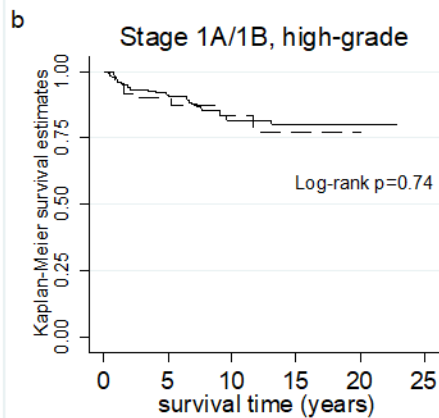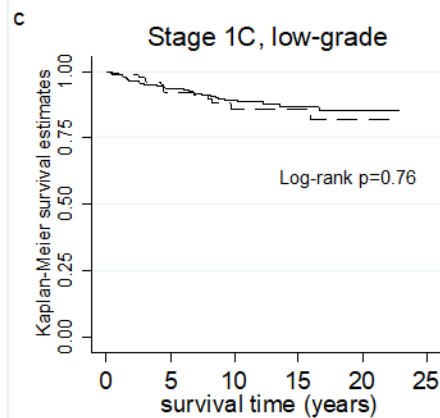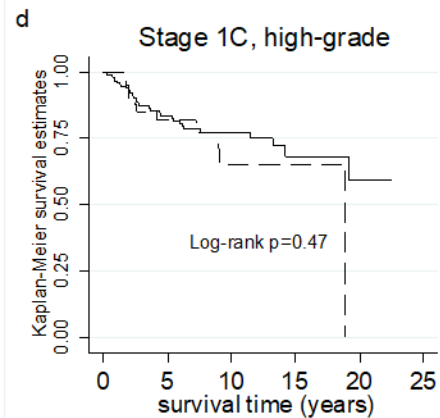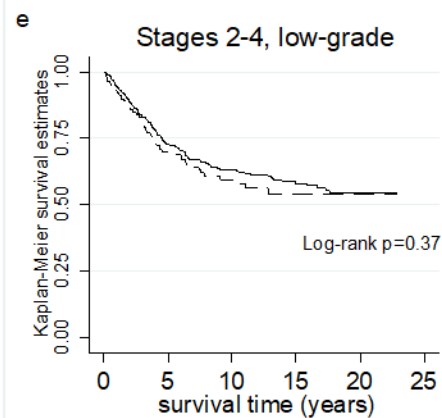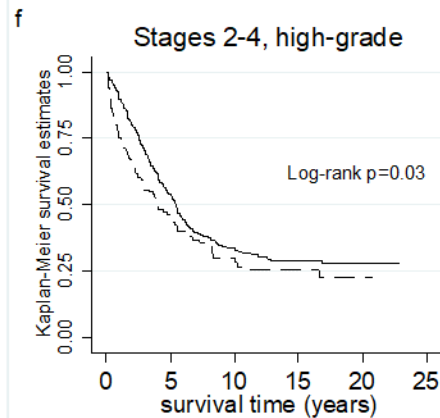

————— No FSS      - - - - - FSS

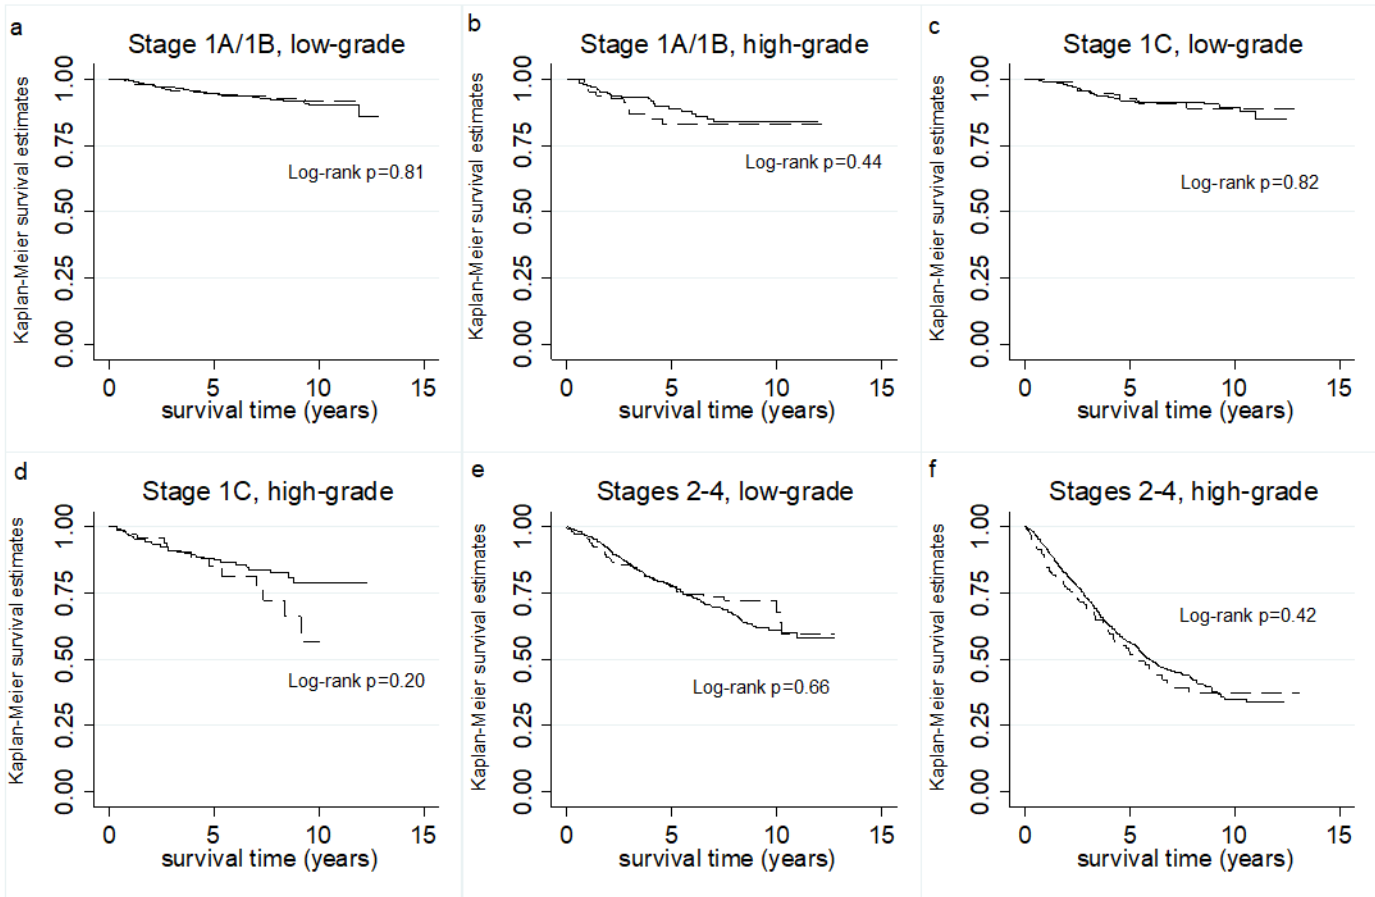

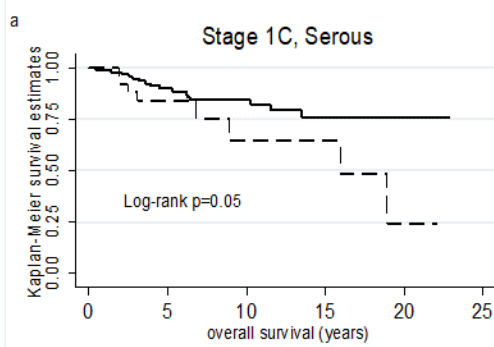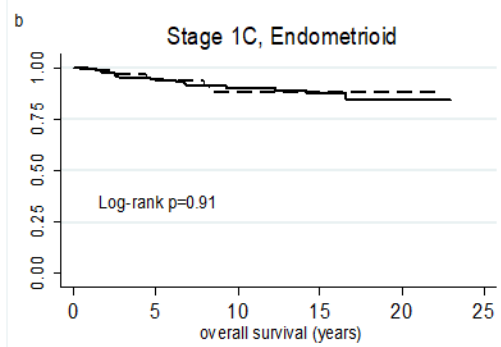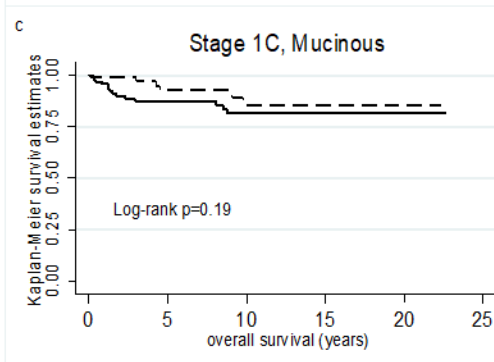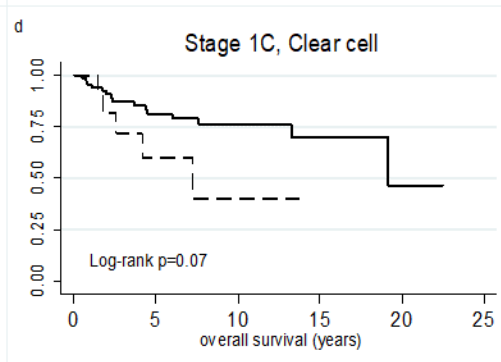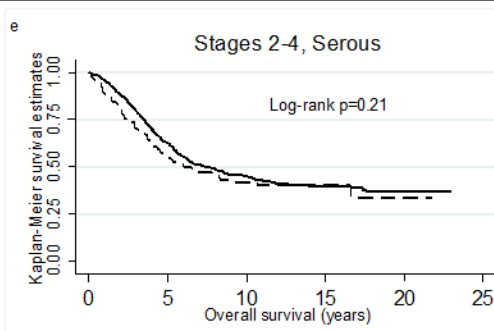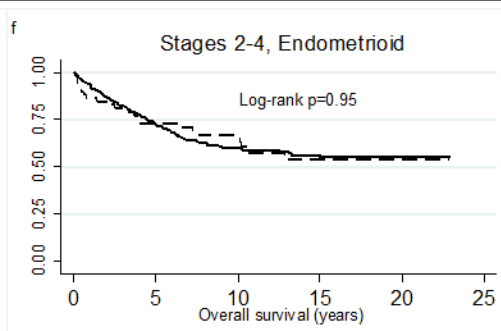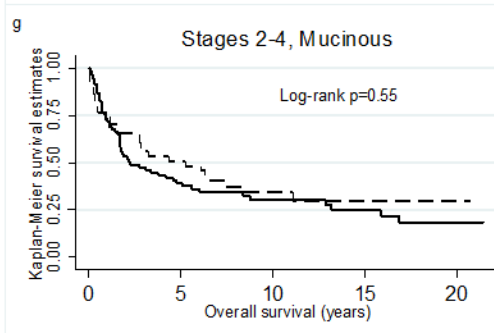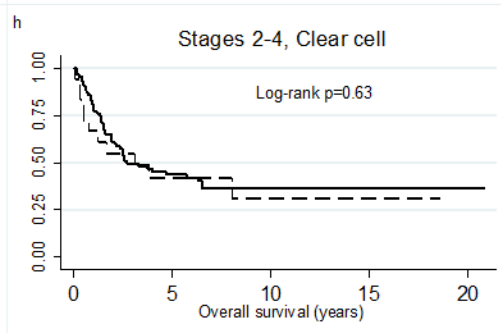

————— No FSS      - - - - - FSS

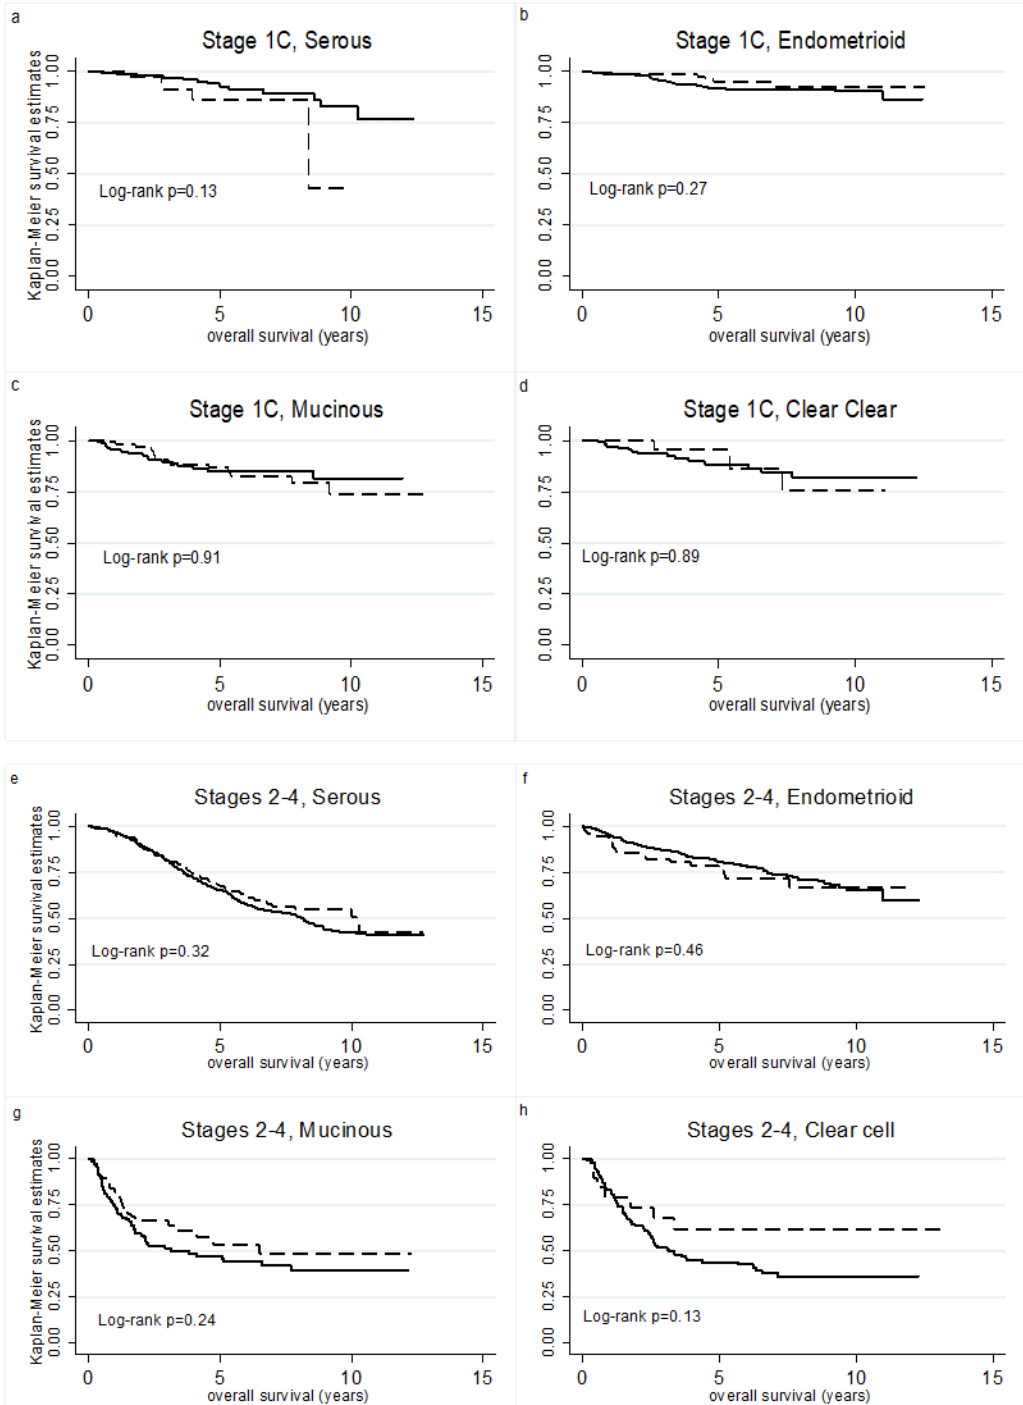

————— No FSS      - - - - - FSS

Supplement: NIHMS1057030-supplement-Supp_figS1-4.pdf [file NIHMS1057030-supplement-Supp_figS1-4.pdf]
